# Supplementary material
Source: publisher figshare collection journal article supplement (https://frontiersin.figshare.com/ndownloader/files/12417149)
Supplement: Supplementary file [file 12417149]

# The age-related perfusion pattern measured with arterial spin labeling MRI in healthy subjects

Nan Zhang, Marc L. Gordon\*, Yilong Ma, Bradley Chi, Jesus J Gomar, Shichun Peng, Peter B. Kingsley, David Eidelberg, Terry E. Goldberg

\* Correspondence: Marc L. Gordon: [mlgordon@northwell.edu](mailto:mlgordon@northwell.edu)

## Supplementary Data

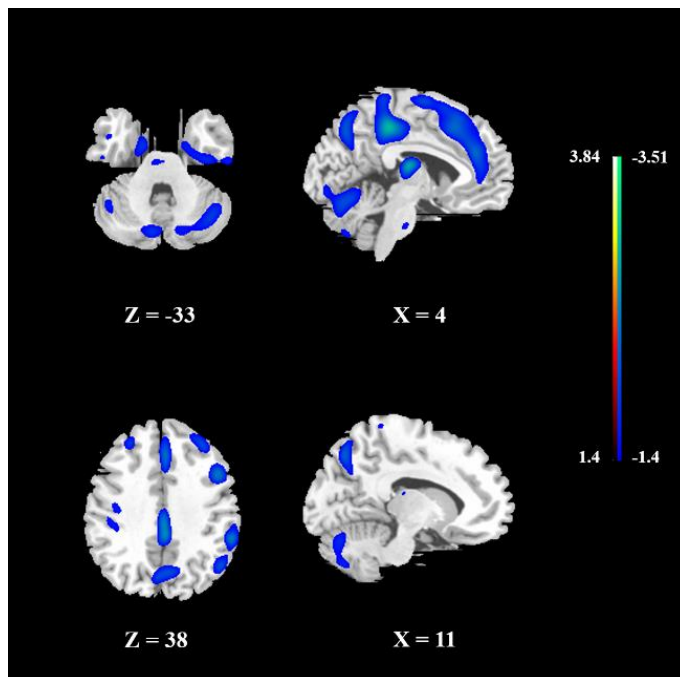

**Supplementary Figure 4.** The pattern of CBF changes with aging identified through PC1 plus PC5 using SSM/PCA. Cold color indicates regions loading negatively correlated with age.
